# Supplementary material
Source: PubMed Central journal article supplement (PMC11626265)
Supplement: ajcr0014-5486-f9.pdf [file ajcr0014-5486-f9.pdf]

## RBM15 increase tumor-infiltrating CD4+ T cell in ESCC via modulating of PLOD3

**Supplementary Table 1.** Summary of clinical characteristics of the 19 esophageal squamous cell carcinoma patients

| Variables         | All cases (N=19; %) |
|-------------------|---------------------|
| Gender            |                     |
| Male              | 17 (89.5)           |
| Female            | 2 (10.5)            |
| Age (year)        |                     |
| < 65              | 6 (31.6)            |
| ≥ 65              | 13 (68.4)           |
| Size (cm)         |                     |
| < 4               | 3 (15.8)            |
| ≥ 4               | 16 (84.2)           |
| Grade             |                     |
| Poor              | 4 (21.1)            |
| Moderate          | 10 (52.6)           |
| Well              | 5 (26.3)            |
| Lymph node status |                     |
| 0                 | 12 (63.2)           |
| ≥ 1               | 7 (36.8)            |

NOTE: The numbers in parentheses indicate the percentages of tumors with a special clinical.

# RBM15 increase tumor-infiltrating CD4+ T cell in ESCC via modulating of PLOD3

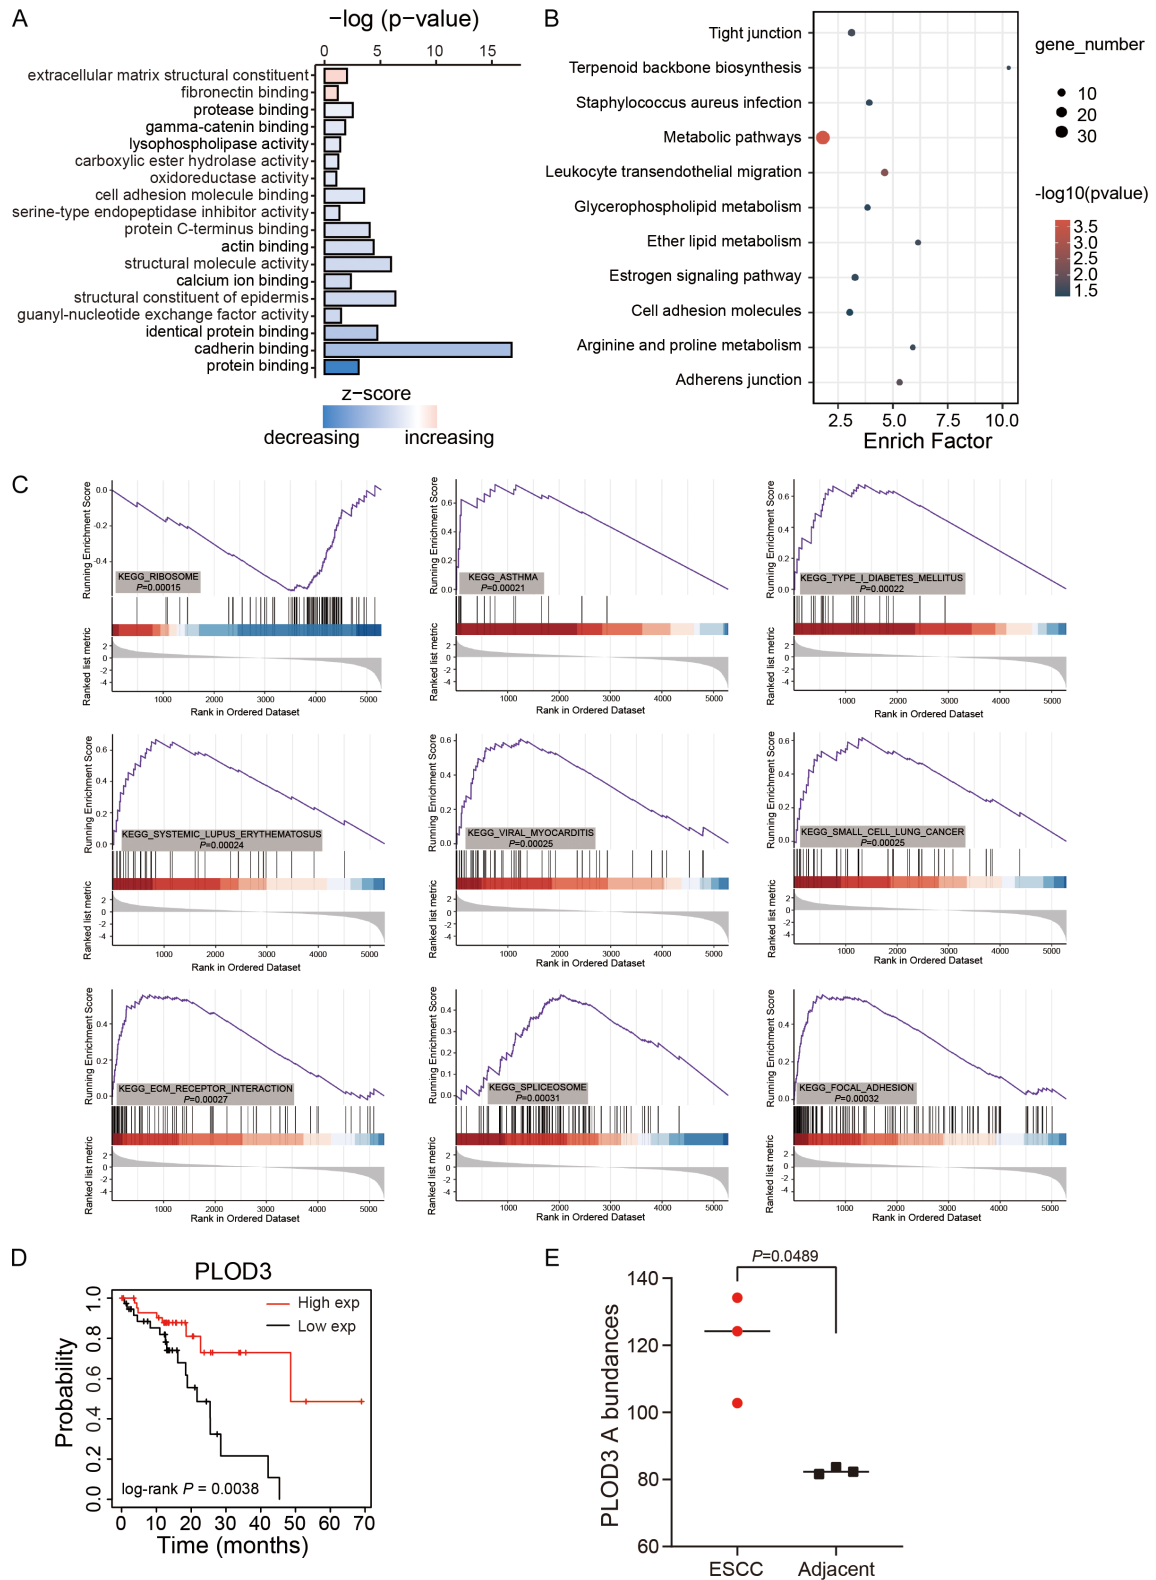

**Supplementary Figure 1.** Analysis of signaling pathways. (A-C) GO (A), KEGG (B) and GSEA (C) analysis of differential proteins in ESCC. (D) The overall survival (OS) curve of high- and low-PLOD3 groups in KM-plotter ESCC data set. (E) PLOD3 abundances in ESCC tumor and adjacent tissue which was used in LC-MS/MS. Paired, two-tailed Student's t-test.

RBM15 increase tumor-infiltrating CD4+ T cell in ESCC via modulating of PLOD3

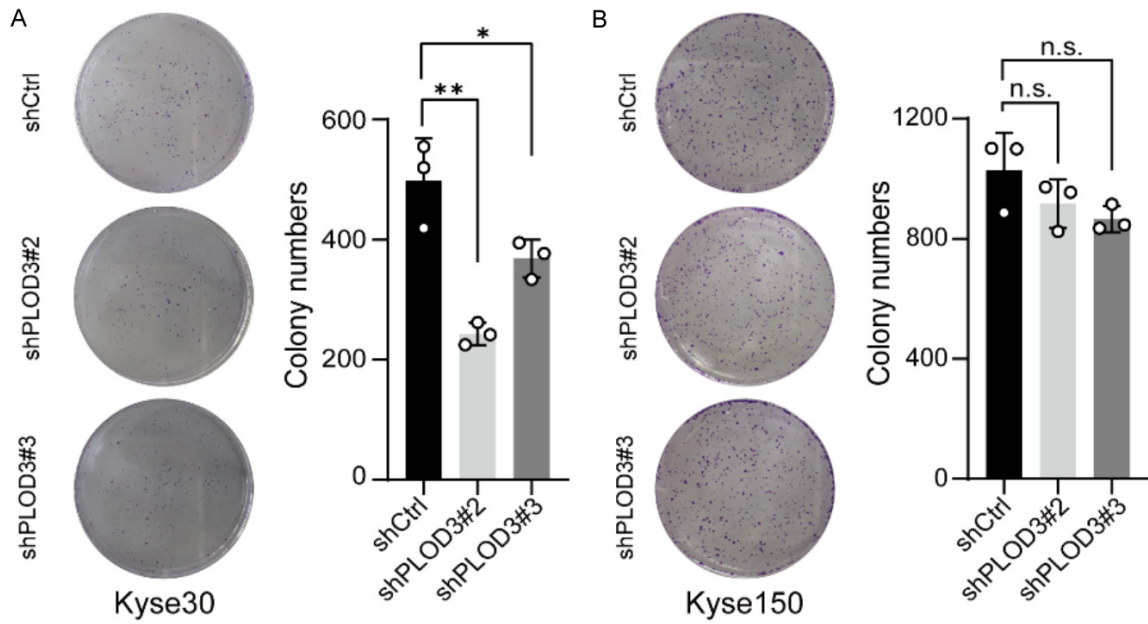

**Supplementary Figure 2.** PLOD3 has no effect on clone formation in ESCC cells. (A, B) Colony formation assay in Kyse30 (A) and Kyse150 (B) cells. Representative images and statistical plots are shown; Mean  $\pm$  s.d. are given for three independent experiments. One-way ANOVA; \* $P < 0.05$ , \*\* $P < 0.01$ , n.s.-no significant difference.

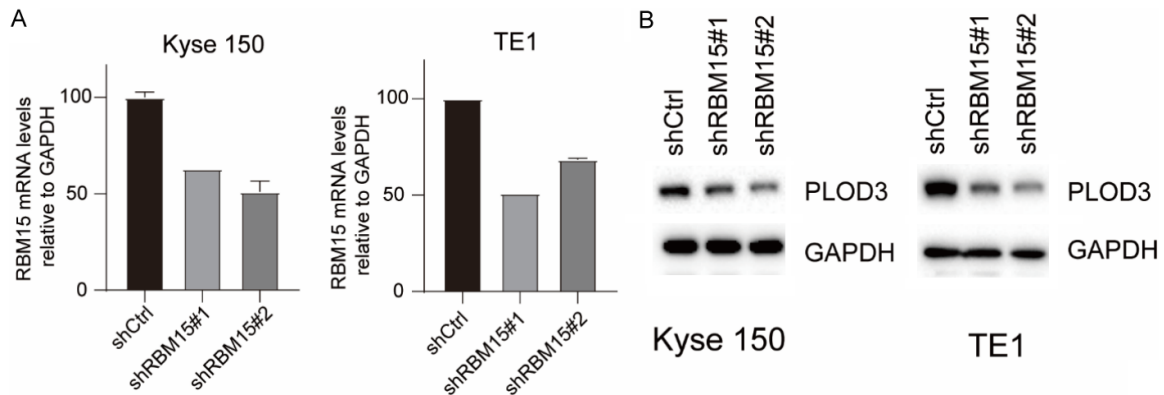

**Supplementary Figure 3.** RBM15 regulates PLOD3 expression in ESCC cells. A. Efficient knockdown of RBM15 by shRNA in Kyse150 and TE1 cells was verified by quantitative real-time PCR. B. PLOD3 expression was determined by Western blot.
